# Supplementary figures and images for: Low temperature multimode atomic force microscopy using an active MEMS cantilever
Source: Royal Society of Chemistry journal article supplement (doi:10.1039/d4nr04169k), 2025-01-01

Detected height [nm]

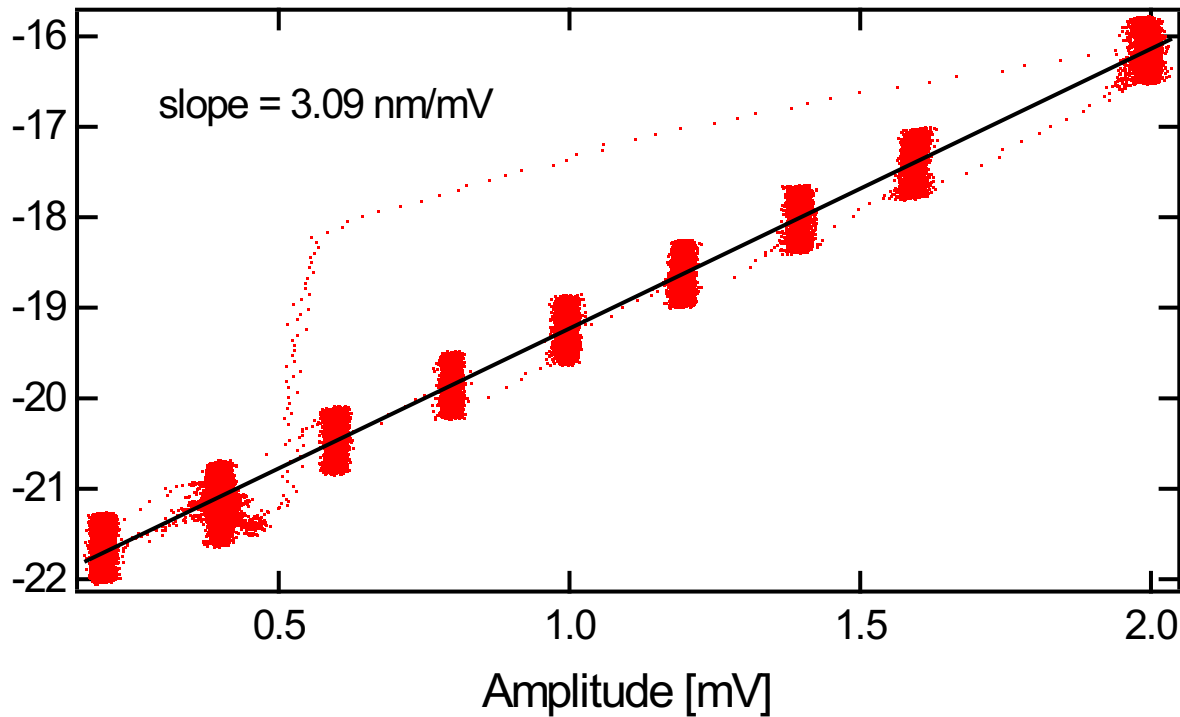

Supplement: d4nr04169k2.zip [file d4nr04169k2.zip]

## MEMS Sensor

2D FFT Filtered Image

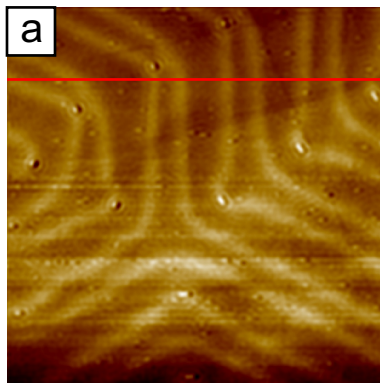

Noise Image

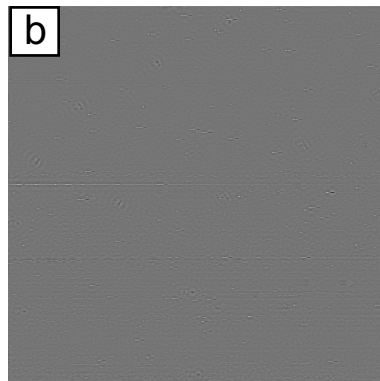

## qPlus Sensor

2D FFT Filtered Image

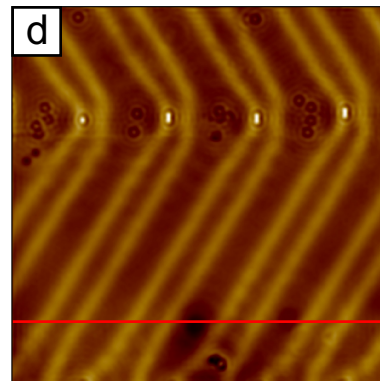

Noise Image

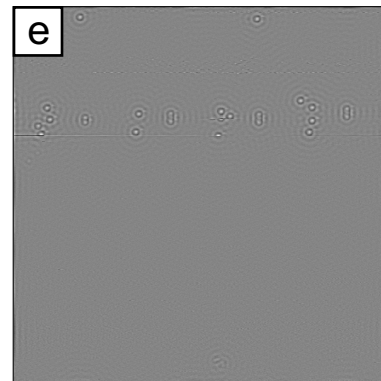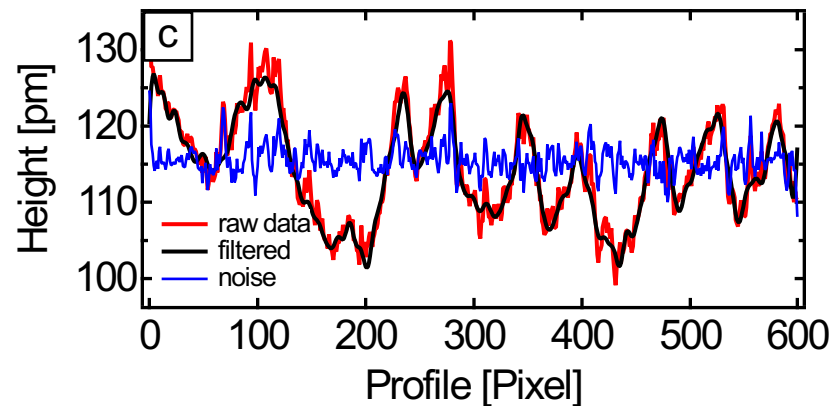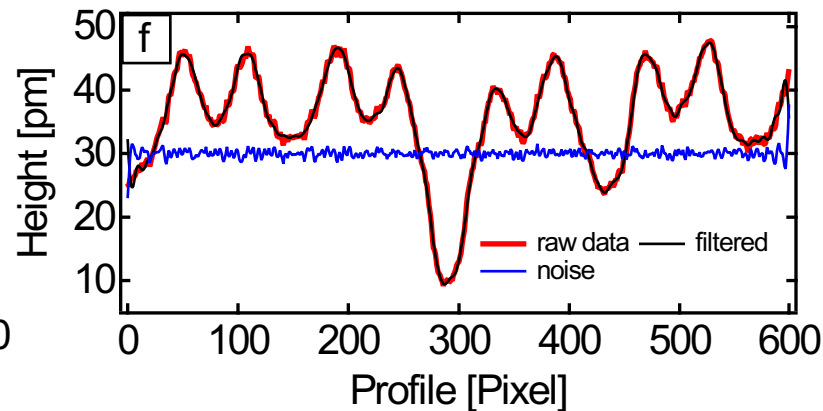

Supplement: d4nr04169k2.zip [file d4nr04169k2.zip]

Detected height [nm]

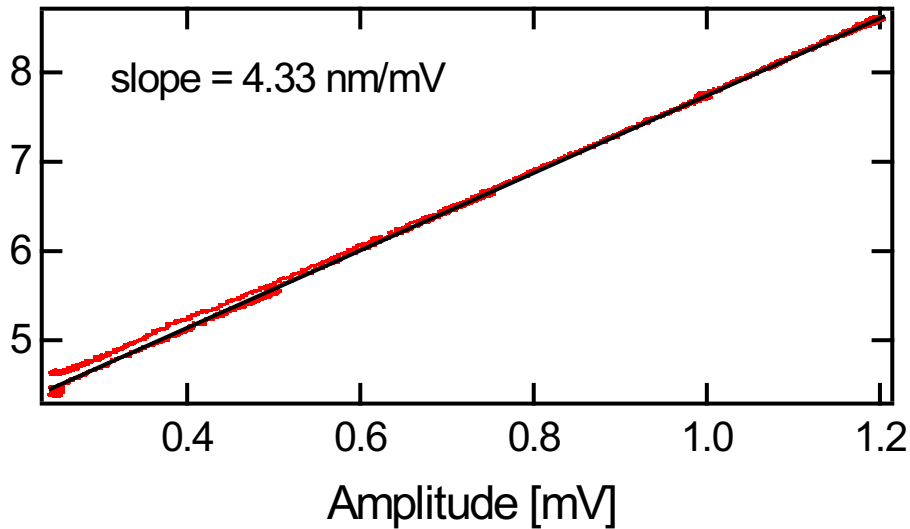

Supplement: d4nr04169k2.zip [file d4nr04169k2.zip]

## MEMS Sensor

2D FFT Filtered Image

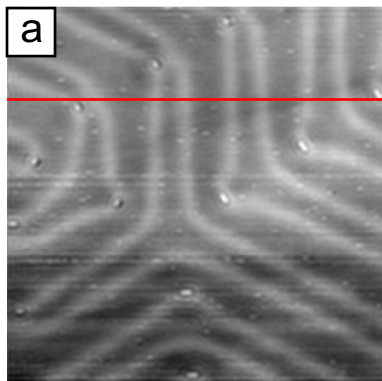

Noise Image

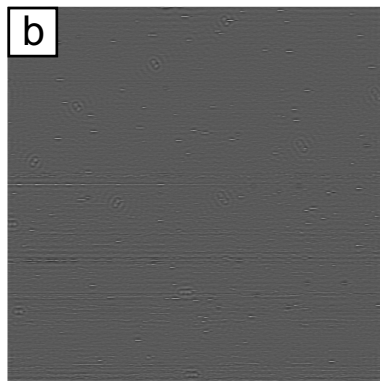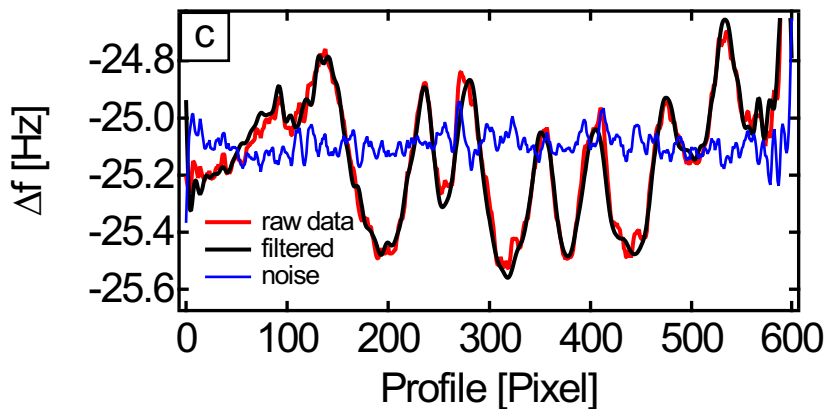

## qPlus Sensor

2D FFT Filtered Image

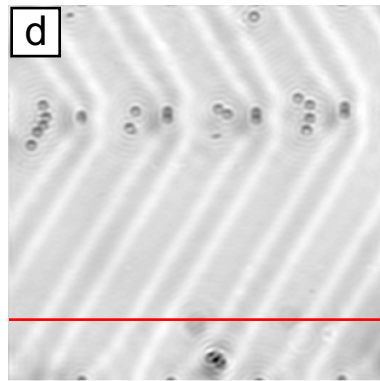

Noise Image

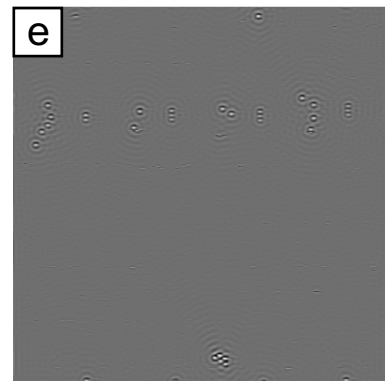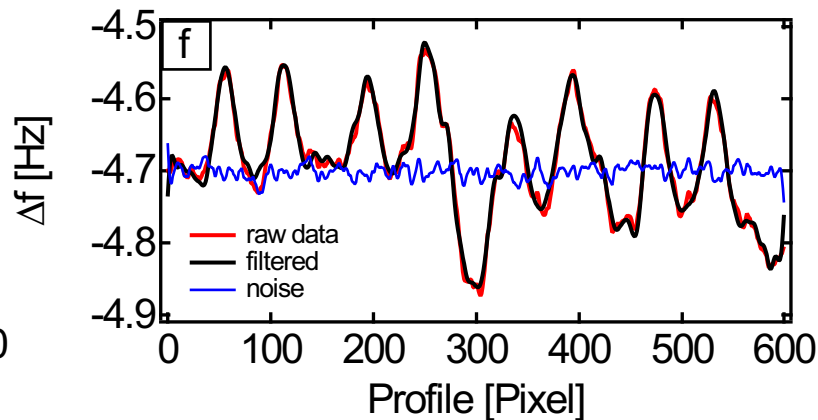

Supplement: d4nr04169k2.zip [file d4nr04169k2.zip]

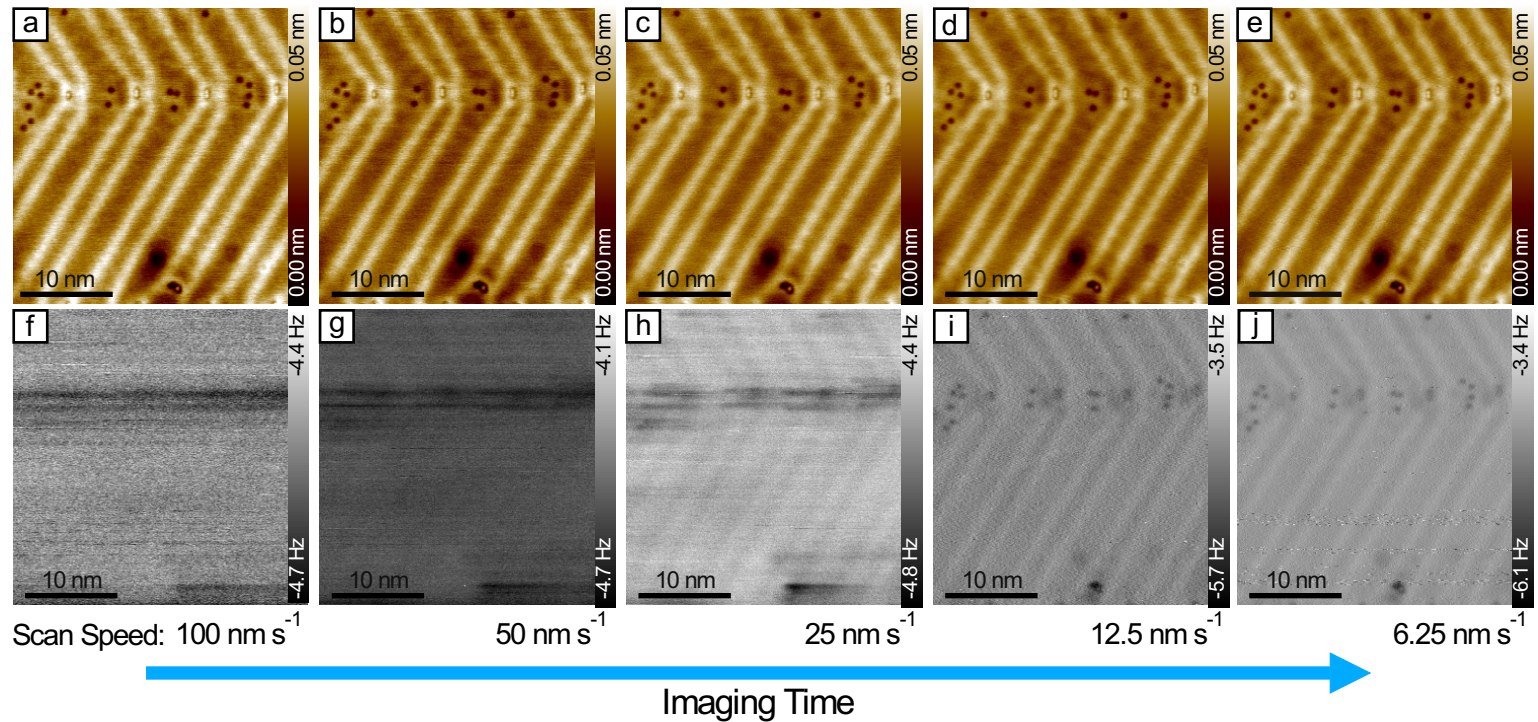

Supplement: d4nr04169k2.zip [file d4nr04169k2.zip]

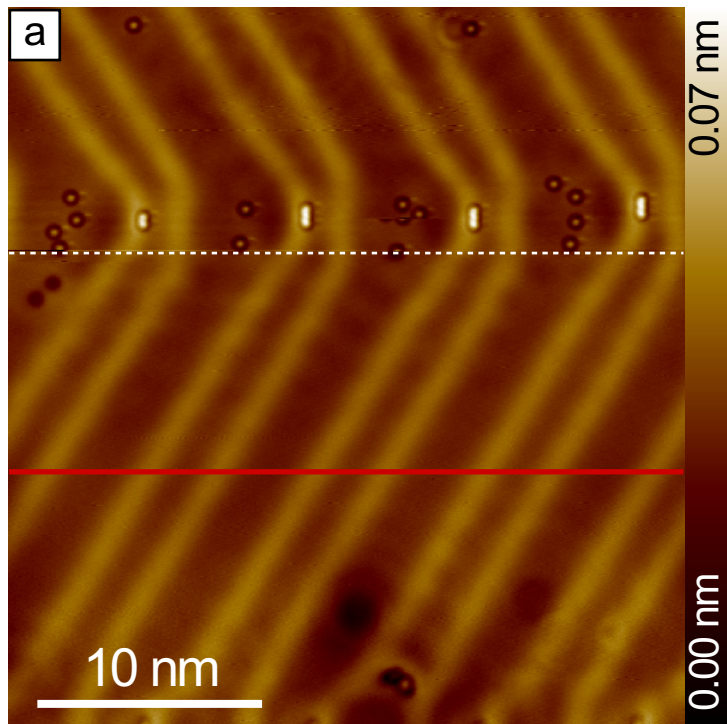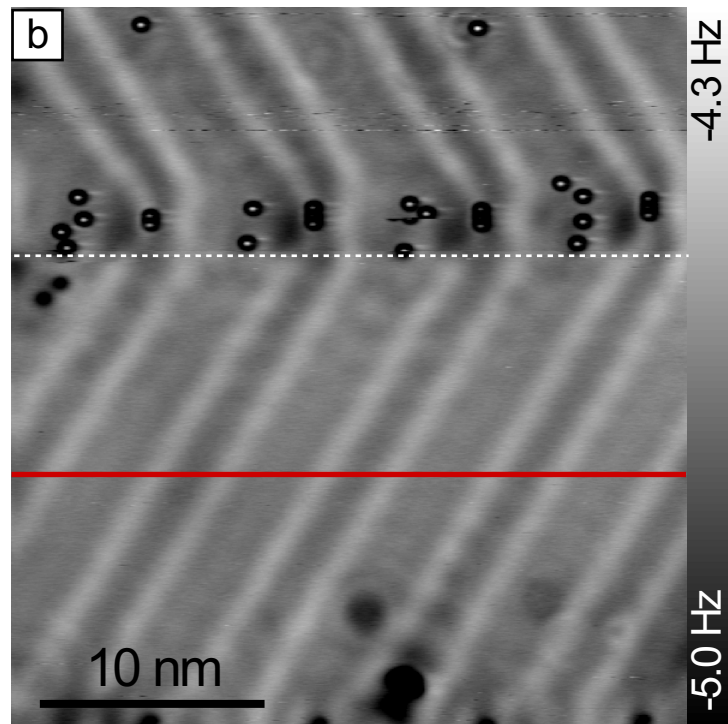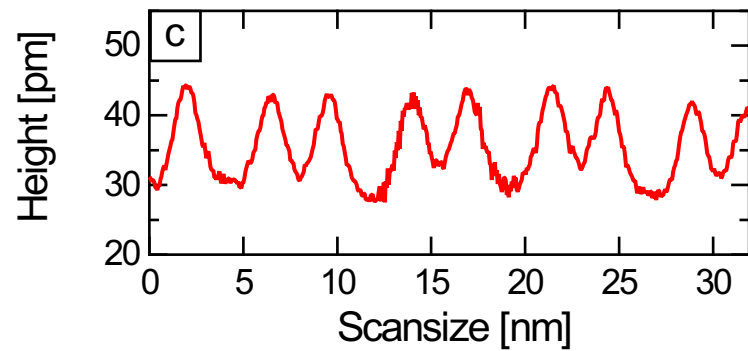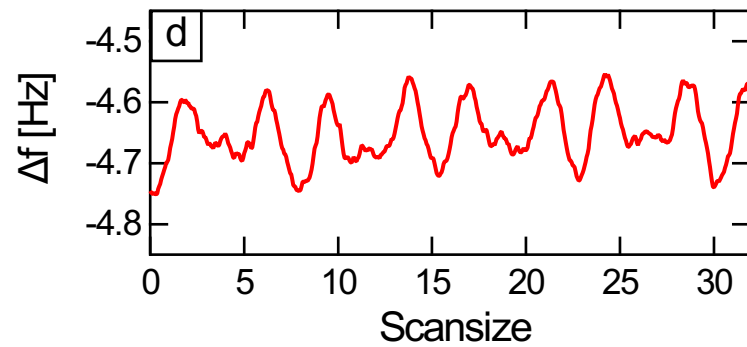

Supplement: d4nr04169k2.zip [file d4nr04169k2.zip]

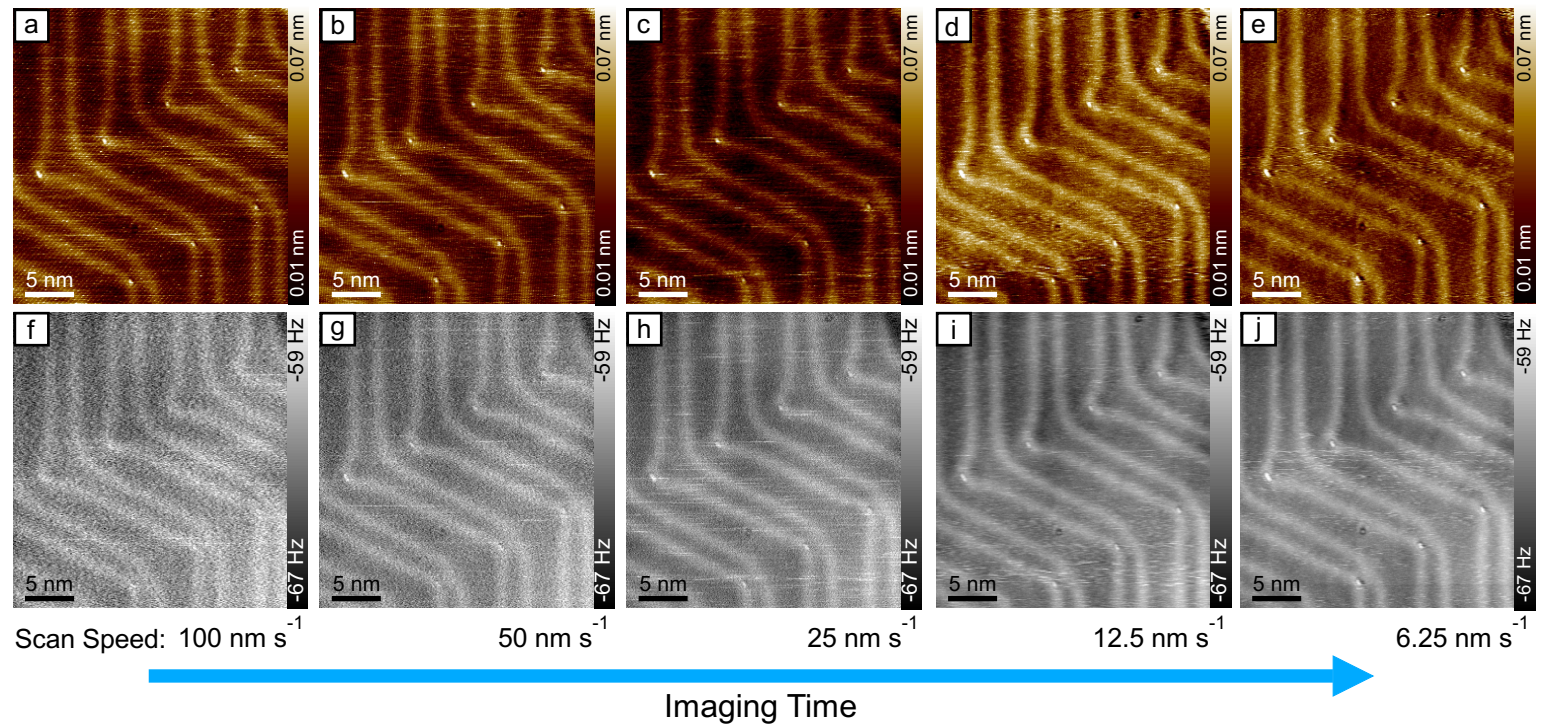

Supplement: d4nr04169k2.zip [file d4nr04169k2.zip]
